# Supplementary material for: Spin-Glass Transitions in Zn1-xFexO Nanoparticles
Source: PubMed Central journal article supplement (PMC7079620; doi:10.3390/ma13040869), 2020-02-14
Supplement: materials-13-00869-s001.pdf [file materials-13-00869-s001.pdf]

## Spin-Glass Transitions in $Zn_{1-x}Fe_xO$ Nanoparticles

Lilian Felipe S. Tupan <sup>1</sup>, Marlon I. Valerio-Cuadros <sup>1</sup>, Aline Alves Oliveira <sup>1</sup>, Reginaldo Barco <sup>1</sup>, Flávio Francisco Ivashita <sup>1</sup>, Lutiene F. Lopes <sup>2</sup>, Edson C. Passamani <sup>3</sup> and Andrea Paesano Jr. <sup>1,\*</sup>

<sup>1</sup> Departamento de Física, Maringá State University, Av. Colombo, 5790 – Zona 7, 87020-900 Maringá, PR, Brazil; lilian.tupan@hotmail.com (L.F.S.T.); marlon190@gmail.com (M.I.V.C.); alineuem@hotmail.com (A.A.O.); r\_barco@hotmail.com (R.B.); fivashita@gmail.com (F.F.I)

<sup>2</sup> Instituto de Física, Federal University of Rio Grande do Sul, 91501-970 Porto Alegre, RS, Brazil; lutienefl@gmail.com

<sup>3</sup> Departamento de Física, Federal University of Espírito Santo, 29075-010 Vitória, ES, Brazil; edson@cce.ufes.br

\* Correspondence; apjunior@uem.br; Tel.: 55-44-3011-5928;

Received: 15 December 2019; Accepted: 6 January 2020; Published: 14 February 2020

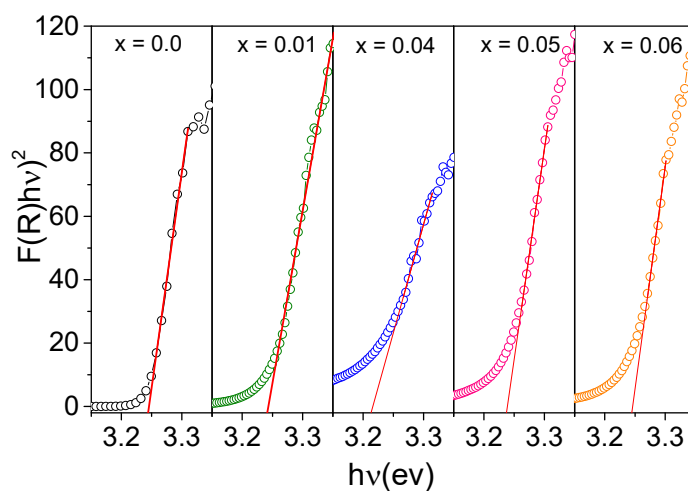

Figure S1. Tauc plots for the undoped and Fe-doped ZnO.

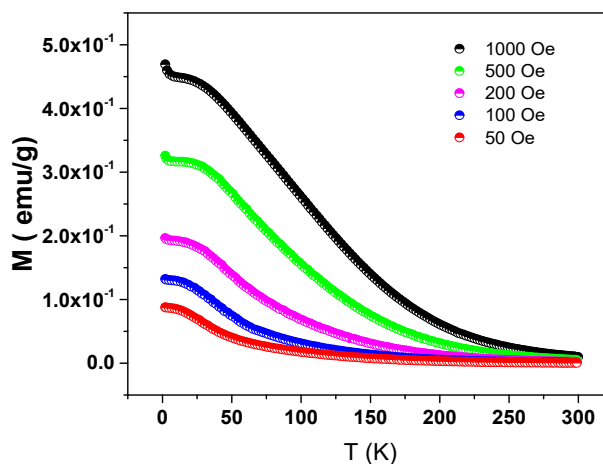

Figure S2. FC curves for the  $Zn_{0.95}Fe_{0.05}O$  sample, taken with different applied magnetic fields. For the highest fields and at the lowest temperatures, the frustration is removed.

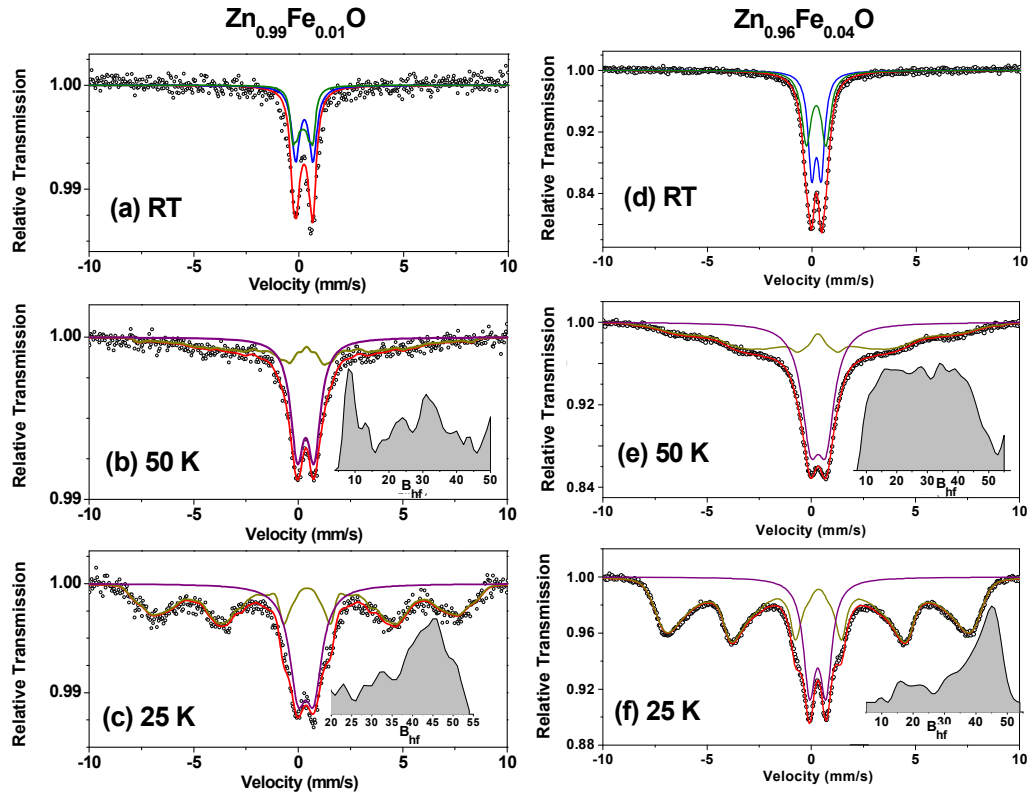

**Figure S3.** Mössbauer spectra taken with  $|V_{\max}| = 10$  mm/s for the  $\text{Zn}_{0.99}\text{Fe}_{0.01}\text{O}$  sample at RT (a), 50 K (b) and 25 K (c) and for the  $\text{Zn}_{0.96}\text{Fe}_{0.04}\text{O}$  sample at RT (d), 50 K (e) and 25 K (f). The inserts represent the hyperfine magnetic field distributions.

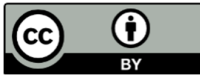

© 2020 by the authors. Licensee MDPI, Basel, Switzerland. This article is an open access article distributed under the terms and conditions of the Creative Commons Attribution (CC BY) license (<http://creativecommons.org/licenses/by/4.0/>).
